# Supplementary material for: Prognostic value of routine laboratory variables in prediction of breast cancer recurrence
Source: PubMed Central journal article supplement (PMC5557903; doi:10.1038/s41598-017-08240-2), 2017-08-15
Supplement: 41598_2017_8240_MOESM1_ESM.pdf [file 41598_2017_8240_MOESM1_ESM.pdf]

## **Prognostic value of routine laboratory variables in prediction of breast cancer recurrence**

Zhu Zhu<sup>1,2</sup>, Ling Li<sup>2</sup>, Zhong Ye<sup>2</sup>, Tong Fu<sup>1</sup>, Ye Du<sup>1</sup>, Aiping Shi<sup>1</sup>, Di Wu<sup>1</sup>, Ke Li<sup>3</sup>, Yifan Zhu<sup>2</sup>,  
Chun Wang<sup>2,4,\*</sup> & Zhimin Fan<sup>1,\*</sup>

**Supplementary Table S1. Values of laboratory variables in the training and testing sets.**

| Panels<br>Variables (unit)            | Training set |        |       |  | Testing set |        |       | P<br>value |
|---------------------------------------|--------------|--------|-------|--|-------------|--------|-------|------------|
|                                       | N            | Mean   | SD    |  | N           | Mean   | SD    |            |
| <b>Complete Blood Count</b>           |              |        |       |  |             |        |       |            |
| <b>HCT (%)</b>                        | 1026         | 37.05  | 4.33  |  | 520         | 37.08  | 4.21  | 0.90       |
| <b>HGB (g/dL)</b>                     | 1027         | 12.34  | 1.50  |  | 520         | 12.31  | 1.43  | 0.71       |
| <b>MCH (pg)</b>                       | 1031         | 29.89  | 2.35  |  | 523         | 29.76  | 2.25  | 0.28       |
| <b>MCHC (g/dL)</b>                    | 1026         | 33.31  | 1.11  |  | 520         | 33.21  | 1.14  | 0.11       |
| <b>MCV (fL)</b>                       | 1027         | 89.68  | 5.88  |  | 520         | 89.53  | 5.68  | 0.64       |
| <b>Platelet (B/L)</b>                 | 1027         | 260.84 | 67.72 |  | 520         | 259.54 | 64.75 | 0.72       |
| <b>MPV (fL)</b>                       | 608          | 10.72  | 0.91  |  | 304         | 10.75  | 0.89  | 0.72       |
| <b>RBC (T/L)</b>                      | 1032         | 4.15   | 0.56  |  | 520         | 4.16   | 0.49  | 0.88       |
| <b>RDW (%)</b>                        | 1026         | 13.81  | 1.60  |  | 520         | 13.87  | 1.65  | 0.53       |
| <b>WBC (B/L)</b>                      | 1028         | 7.48   | 2.59  |  | 520         | 7.66   | 3.29  | 0.28       |
| <b>Comprehensive Metabolic Panel</b>  |              |        |       |  |             |        |       |            |
| <b>Albumin (g/dL)</b>                 | 680          | 4.28   | 0.39  |  | 339         | 4.28   | 0.39  | 0.79       |
| Protein(g/dl)                         | 301          | 6.28   | 1.71  |  | 158         | 6.39   | 1.61  | 0.49       |
| <b>ALP (IU/L)</b>                     | 738          | 74.86  | 43.17 |  | 374         | 75.09  | 29.31 | 0.92       |
| <b>ALT (IU/L)</b>                     | 616          | 23.91  | 18.33 |  | 326         | 22.34  | 10.44 | 0.91       |
| <b>AST (IU/L)</b>                     | 739          | 25.42  | 13.62 |  | 374         | 24.20  | 8.13  | 0.75       |
| <b>Total Bilirubin (mg/dL)</b>        | 722          | 0.60   | 0.26  |  | 372         | 0.57   | 0.21  | 0.15       |
| <b>Anion Gap (mmol/L)</b>             | 955          | 8.51   | 2.05  |  | 480         | 8.39   | 1.97  | 0.30       |
| <b>Creatinine (mg/dL)</b>             | 963          | 0.84   | 0.45  |  | 485         | 0.84   | 0.34  | 0.99       |
| Glucose (mg/dL)                       | 400          | 105.71 | 40.97 |  | 207         | 111.93 | 46.86 | 0.11       |
| <b>Urea Nitrogen (mg/dL)</b>          | 957          | 14.72  | 6.04  |  | 481         | 14.90  | 6.53  | 0.62       |
| <b>Coagulation Panel</b>              |              |        |       |  |             |        |       |            |
| <b>INR</b>                            | 640          | 1.06   | 0.19  |  | 315         | 1.05   | 0.18  | 0.42       |
| <b>PT</b>                             | 577          | 14.30  | 5.18  |  | 282         | 13.88  | 2.02  | 0.09       |
| <b>PTT</b>                            | 631          | 30.64  | 6.17  |  | 315         | 30.1   | 6.61  | 0.94       |
| <b>Leukocyte Differentiation Test</b> |              |        |       |  |             |        |       |            |
| Neutrophils                           | 428          | 65.87  | 12.02 |  | 203         | 65.94  | 11.67 | 0.94       |
| Lymphocytes                           | 426          | 23.24  | 10.21 |  | 203         | 23.43  | 9.59  | 0.83       |
| Monocytes                             | 426          | 8.61   | 3.63  |  | 203         | 8.20   | 3.68  | 0.19       |
| Eosinophils                           | 426          | 1.86   | 1.65  |  | 203         | 1.92   | 1.93  | 0.65       |
| Basophils                             | 426          | 0.49   | 0.41  |  | 203         | 0.48   | 0.45  | 0.91       |
| Absolute Neutrophils                  | 393          | 5.47   | 2.79  |  | 185         | 5.51   | 2.58  | 0.87       |
| Absolute Lymphocytes                  | 393          | 1.60   | 0.66  |  | 185         | 1.64   | 0.69  | 0.48       |
| Absolute Monocytes                    | 393          | 0.60   | 0.25  |  | 185         | 0.58   | 0.29  | 0.42       |
| Absolute Eosinophils                  | 393          | 0.13   | 0.13  |  | 185         | 0.13   | 0.14  | 0.79       |
| Absolute Basophils                    | 393          | 0.02   | 0.03  |  | 185         | 0.02   | 0.03  | 0.69       |

Abbreviations: HCT, hematocrit; HGB, hemoglobin; MCH, mean corpuscular hemoglobin; MCHC, mean corpuscular hemoglobin concentration; MCV, mean corpuscular volume; MPV, mean platelet volume; RBC, red blood cell; RDW, red cell distribution width; WBC, white blood cell; ALP, alkaline phosphatase; ALT, alanine amino transferase; AST, aspartate amino transferase; INR, international normalized ratio; PT, prothrombin time; PTT, partial thromboplastin time; SD, standard deviation. Variables which are valid for further analyses are shown in bold.

**Supplementary Table S2. Univariate analysis of the associations of demographic and basic clinical variables with patient disease-free survival in the training set.**

| Variables                   | Level                      | No. of patients disease free /recurrence | <i>P</i> | HR (95% CI)       | Cox <i>P</i> | Log-rank <i>P</i> |
|-----------------------------|----------------------------|------------------------------------------|----------|-------------------|--------------|-------------------|
| Age                         | <58                        | 361/156                                  | 0.0002   | 1.00              |              | <0.0001           |
|                             | ≥58                        | 322/225                                  |          | 1.53 (1.25-1.88)  | <0.0001      |                   |
| Race                        | Caucasian                  | 512/265                                  | 0.03     | 1.00              |              | 0.001             |
|                             | African American           | 121/93                                   |          | 1.54 (1.22-1.96)  | 0.0003       |                   |
|                             | Others                     | 50/23                                    |          | 1.05 (0.68-1.60)  | 0.84         |                   |
| Smoking status              | Never                      | 354/217                                  | 0.09     | 1.00              |              | 0.94              |
|                             | Current                    | 77/47                                    |          | 0.97 (0.71-1.33)  | 0.86         |                   |
|                             | Former                     | 140/75                                   |          | 0.96 (0.74-1.24)  | 0.74         |                   |
|                             | Unknown                    | 112/42                                   |          | 0.90 (0.65-1.26)  | 0.55         |                   |
| Drinking status             | Never                      | 317/165                                  | 0.02     | 1.00              |              | 0.52              |
|                             | Ever                       | 228/158                                  |          | 0.89 (0.71-1.10)  | 0.28         |                   |
|                             | Unknown                    | 138/58                                   |          | 0.88 (0.66-1.21)  | 0.46         |                   |
| Tumor stage                 | Stage I                    | 412/154                                  | <0.0001  | 1.00              |              | <0.0001           |
|                             | Stage II                   | 227/128                                  |          | 1.38 (1.09-1.74)  | 0.008        |                   |
|                             | Stage III                  | 40/72                                    |          | 3.29 (2.49-4.36)  | <0.0001      |                   |
|                             | Stage IV                   | 4/27                                     |          | 8.28 (5.49-12.50) | <0.0001      |                   |
| Tumor grade                 | Well                       | 90/31                                    | <0.0001  | 1.0               |              | 0.0003            |
|                             | Moderately                 | 290/120                                  |          | 0.89 (0.60-1.32)  | 0.55         |                   |
|                             | Poorly                     | 219/176                                  |          | 1.46 (0.99-2.13)  | 0.05         |                   |
|                             | Not determined             | 84/54                                    |          | 1.22 (0.79-1.90)  | 0.37         |                   |
| Tumor histology             | Invasive ductal carcinoma  | 557/311                                  | 0.31     | 1.00              |              | 0.15              |
|                             | Invasive lobular carcinoma | 44/30                                    |          | 1.18 (0.82-1.73)  | 0.37         |                   |
|                             | Mixed carcinoma            | 74/32                                    |          | 0.81 (0.56-1.16)  | 0.24         |                   |
|                             | Other                      | 8/8                                      |          | 1.82 (0.91-3.69)  | 0.09         |                   |
| Tumor size                  | No mass/unknown            | 171/75                                   | <0.0001  | 1.00              |              | <0.0001           |
|                             | 2-9mm                      | 129/52                                   |          | 0.63 (0.44-0.90)  | 0.01         |                   |
|                             | 10-29mm                    | 294/153                                  |          | 0.72 (0.54-0.95)  | 0.02         |                   |
|                             | 30-49mm                    | 61/45                                    |          | 1.04 (0.72-1.50)  | 0.84         |                   |
|                             | 50-99mm                    | 24/47                                    |          | 2.17 (1.50-3.12)  | <0.0001      |                   |
|                             | ≥10cm                      | 4/9                                      |          | 2.39 (1.20-4.76)  | 0.01         |                   |
| Lymph nodes metastatic rate | 0%                         | 420/171                                  | <0.0001  | 1.00              |              | <0.0001           |
|                             | 1-20%                      | 79/49                                    |          | 1.39 (1.01-1.91)  | 0.04         |                   |
|                             | 20-49%                     | 34/21                                    |          | 1.33 (0.84-2.09)  | 0.22         |                   |

|                   |                |         |         |                  |         |        |
|-------------------|----------------|---------|---------|------------------|---------|--------|
|                   | 50-79%         | 18/14   |         | 1.95 (1.13-3.37) | 0.02    |        |
|                   | 80-100%        | 12/22   |         | 3.71 (2.37-5.79) | <0.0001 |        |
|                   | Not determined | 102/74  |         | 2.23 (1.70-2.93) | <0.0001 |        |
|                   | Unknown        | 18/30   |         | 2.03 (1.38-2.99) | 0.0003  |        |
| ER status         | Negative       | 131/92  | <0.0001 | 1.00             |         | 0.008  |
|                   | Positive       | 500/234 |         | 0.69 (0.54-0.88) | 0.003   |        |
|                   | Unknown        | 52/55   |         | 0.87 (0.62-1.22) | 0.42    |        |
| PR status         | Negative       | 184/129 | <0.0001 | 1.00             |         | 0.0007 |
|                   | Positive       | 446/196 |         | 0.66 (0.53-0.82) | 0.0002  |        |
|                   | Unknown        | 53/56   |         | 0.86 (0.63-1.18) | 0.36    |        |
| Chemotherapy      | No             | 399/219 | 0.20    | 1.00             |         | 0.05   |
|                   | Yes            | 259/155 |         | 1.29 (1.05-1.59) | 0.02    |        |
|                   | Unknown        | 25/7    |         | 0.96 (0.45-2.04) | 0.91    |        |
| Radiation therapy | No             | 364/239 | 0.01    | 1.0              |         | 0.01   |
|                   | Yes            | 294/133 |         | 0.73 (0.59-0.91) | 0.004   |        |
|                   | Unknown        | 25/9    |         | 1.26 (0.65-2.45) | 0.50    |        |
| Hormone therapy   | No             | 388/264 | 0.0002  | 1.0              |         | 0.01   |
|                   | Yes            | 240/99  |         | 0.79 (0.63-1.00) | 0.045   |        |
|                   | Unknown        | 55/18   |         | 0.55 (0.34-0.89) | 0.015   |        |

Abbreviations: ER, estrogen receptor; PR, progesterone receptor; HR, hazard ratio; CI, confidence interval.

**Supplementary Table S3. Number of times variable was selected out of 10 imputation datasets.**

| <b>Variables</b> | <b>Number of times variable was selected out of 10 imputation datasets</b> | <b>Transfer<sup>1</sup></b> |
|------------------|----------------------------------------------------------------------------|-----------------------------|
| HCT              | 1                                                                          | 2                           |
| HGB              | 9                                                                          | 2                           |
| RBC              | 0                                                                          | -0.5                        |
| RDW              | 0                                                                          | -3                          |
| Albumin          | 0                                                                          | 3                           |
| ALP              | 6                                                                          | 0                           |
| INR              | 7                                                                          | -3                          |
| PT               | 3                                                                          | -3                          |

<sup>1</sup>The following transformations were made for continuous variables in the model: 3 = cube, 2 = square, 0 = natural log, -3 = inverse cube, -0.5 = inverse square root.

Abbreviations: HCT, hematocrit; HGB, hemoglobin; RBC, red blood cell; RDW, red cell distribution width; ALP, alkaline phosphatase; INR, international normalized ratio; PT, prothrombin time.

**Supplementary Table S4. Estimation of prognostic index based on the model developed in this study.**

| <b>Variables</b>            | <b>Enter Value</b> |
|-----------------------------|--------------------|
| Age                         | 80                 |
| Race                        | African American   |
| Stage                       | 2                  |
| Tumor size (mm)             | 8                  |
| Lymph nodes metastatic rate | No nodes examined  |
| ER status                   | Negative           |
| PR status                   | Negative           |
| Chemotherapy                | Yes                |
| Radiation therapy           | No                 |
| Hormone therapy             | No                 |
| Transferred HGB             | 153.76             |
| Transferred ALP             | 4.26               |
| Transferred INR             | 0.68               |
| Prognostic index            | 3.54               |

Low risk group: prognostic index  $\leq 1.36$ ; Median risk group: prognostic index 1.36-1.99; High risk group: prognostic index  $> 1.99$

Abbreviations: ER, estrogen receptor; PR, progesterone receptor; HGB, hemoglobin; ALP, alkaline phosphatase; INR, international normalized ratio.

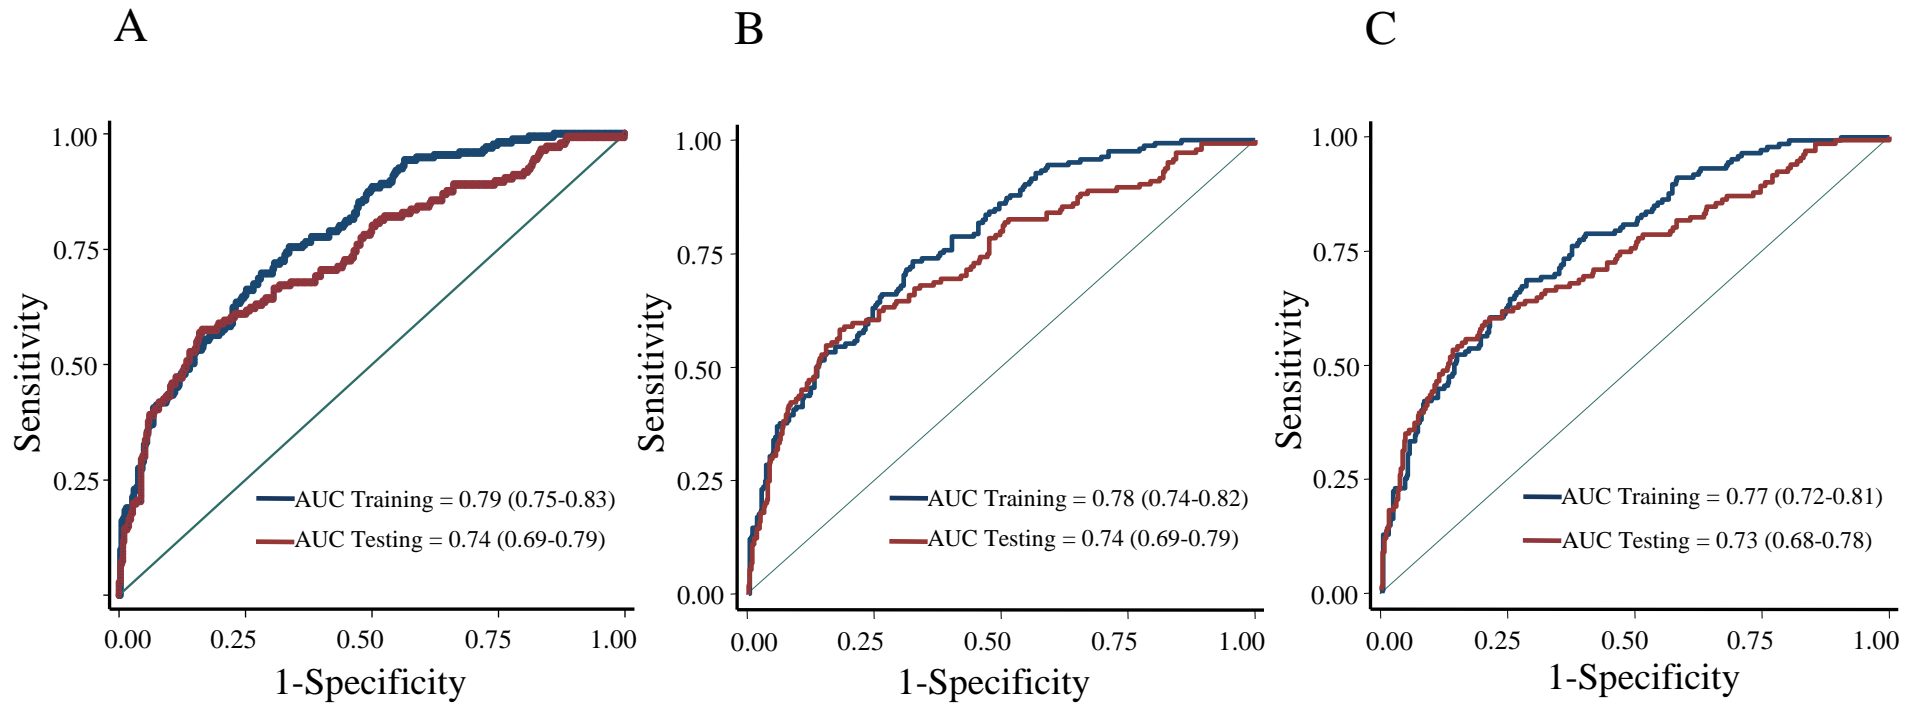

**Supplementary Figure S1. Assessment of model performance in subsets of patients.** The patients were followed  $\geq 3$  months (A),  $\geq 6$  months (B), or  $\geq 12$  months (C).

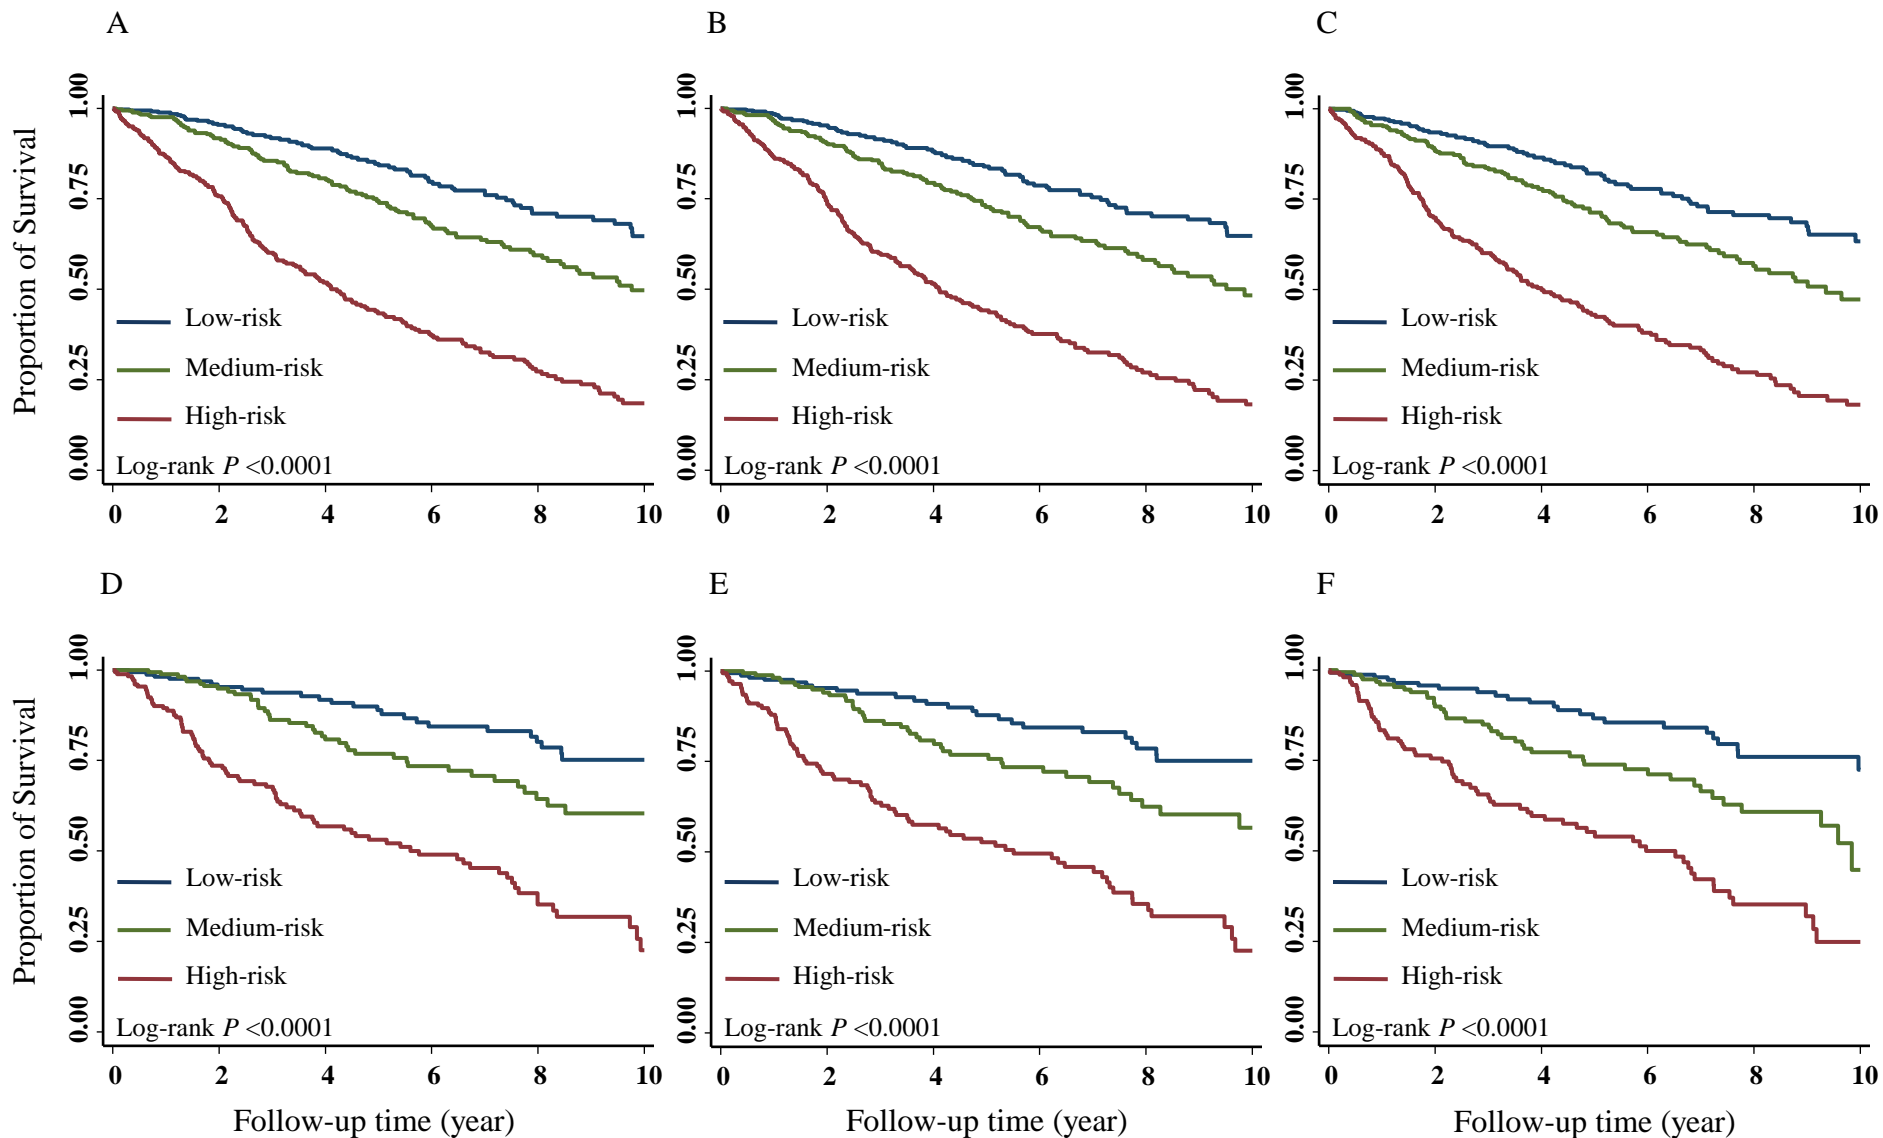

**Supplementary Figure S2. Disease free survival of different risk groups stratified by the final model in subsets of patients.**

The survival curves were compared among different risk groups in the subsets of patients who were followed  $\geq 3$  months (A),  $\geq 6$  months (B), or  $\geq 12$  months (C) in the training set, and in the subsets of patients who were followed  $\geq 3$  months (D),  $\geq 6$  months (E), or  $\geq 12$  months (F) in the testing set, respectively. The time point zeros indicate the time starting from 3 months (A and D), 6 months (B and E), or 12 months (C and F) after surgery.
